# Supplementary material for: Interrupted silicogermanate with 10-ring channels: synthesis and structure determination by combining rotation electron diffraction and powder X-ray diffraction
Source: Royal Society of Chemistry journal article supplement (doi:10.1039/c7qi00309a), 2017-01-01
Supplement: c7qi00309a1.pdf [file c7qi00309a1.pdf]

# **Interrupted silicogermanate with 10-ring channels: synthesis and structure determination by combining rotation electron diffraction and powder X-ray diffraction**

Wang Yilin,<sup>a†</sup> Yunchen Wang,<sup>b†</sup> Jie Su,<sup>b</sup> Xiaowei Song,<sup>a</sup> Wei Wan<sup>b,\*</sup>, Jihong Yu<sup>a,c\*</sup>

<sup>a</sup> State Key Lab of Inorganic Synthesis and Preparative Chemistry, Jilin University, Changchun, 130012, P. R. China.

<sup>b</sup> Berzelii Center EXSELENT on Porous Materials, Department of Materials and Environmental Chemistry, Stockholm University, SE-106 91 Stockholm, Sweden.

<sup>c</sup> International Center of Future Science, Jilin University, Changchun, 130012, P. R. China.

<sup>†</sup> *These authors contributed equally to this work.*

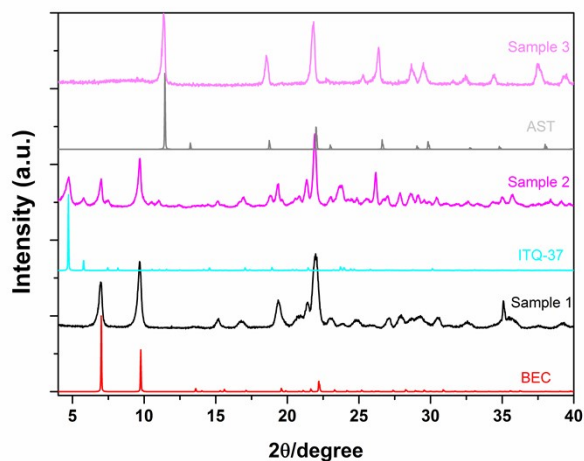

**Fig. S1** XRD patterns of the as-synthesized samples and the simulated XRD patterns.

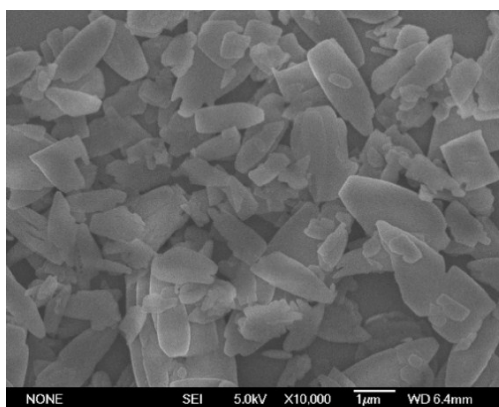

**Fig. S2** The SEM image of as-synthesized JU110.

**Table S1.** The results of chemical and elemental analysis of the as-synthesised sample JU110 compared to the theoretical values calculated from the structure model

|            | In wt% |       |      |      |       | In molar ratio |     |     |           |
|------------|--------|-------|------|------|-------|----------------|-----|-----|-----------|
|            | Si     | Ge    | N    | F    | C     | Ge/Si          | C/N | N/F | (Si+Ge)/N |
| Observed   | 1.99   | 50.08 | 1.62 | 2.41 | 12.55 | 9.7            | 9.0 | 1.1 | 6.57      |
| Calculated | 2.18   | 52.90 | 1.67 | 2.27 | 12.90 | 9.5            | 9.0 | 1.0 | 6.75      |

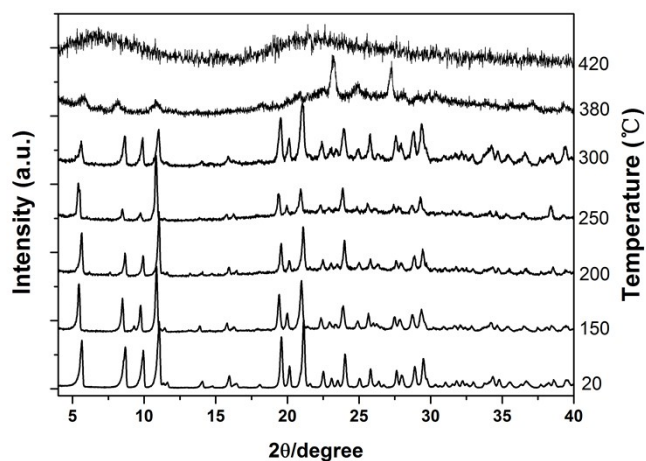

**Fig. S3** The *in-situ* variable temperature PXRD patterns of Ge-JU110.

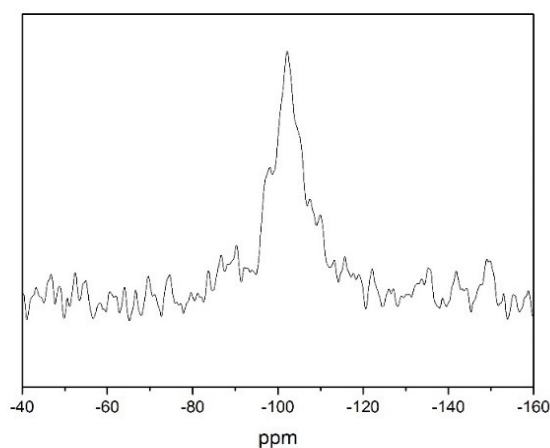

**Fig. S4** The  $^{29}\text{Si}$  MAS NMR spectrum of as-synthesized JU110

**Table S2.** RED data collection, crystal data and structure refinement details of JU110 (resolution cut to 1.0Å)

|                         |                      |
|-------------------------|----------------------|
| Tilt angle              | - 63.59° to + 32.37° |
| Tilt step               | 0.2°                 |
| No. of RED frames       | 528                  |
| Exposure time/frame     | 2.0 s                |
| $a / \text{Å}$          | 13.88                |
| $b / \text{Å}$          | 18.56                |
| $c / \text{Å}$          | 33.59                |
| $\alpha / ^\circ$       | 89.26                |
| $\beta / ^\circ$        | 89.98                |
| $\gamma / ^\circ$       | 89.13                |
| Space group             | <i>Fmmm</i>          |
| Completeness            | 0.530                |
| <i>R</i> <sub>int</sub> | 0.335                |

|                                |                      |
|--------------------------------|----------------------|
| No. of measured reflections    | 885                  |
| No. of independent reflections | 305                  |
| $h$                            | $-13 \leq h \leq 13$ |
| $k$                            | $-14 \leq k \leq 14$ |
| $l$                            | $-22 \leq l \leq 22$ |
| $R1^1$                         | 0.401                |
| No. of parameters              | 53                   |
| No. of restraints              | 65                   |

<sup>1</sup>The structure refinement was done with a structure model with Ge atoms in all the T-sites. The occupancy of Ge/Si at each site could not be refined.

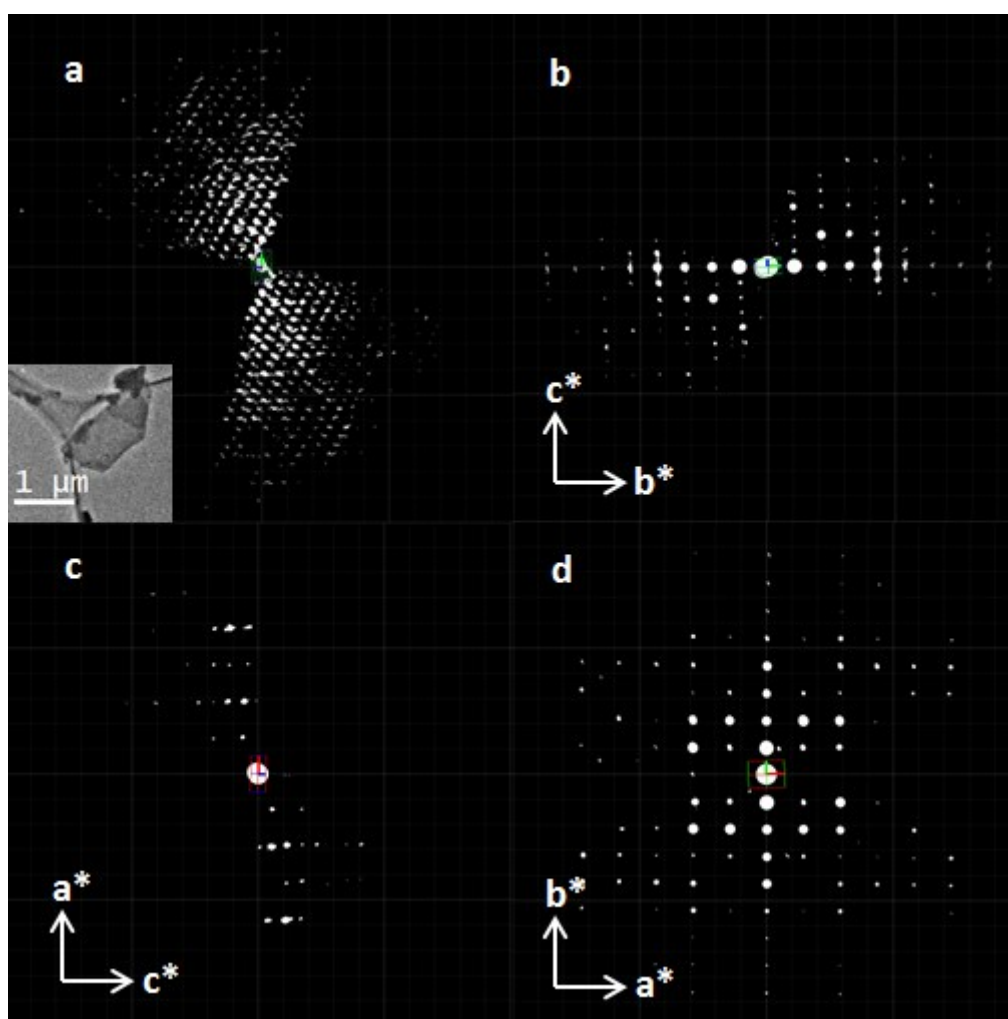

**Fig. S5** (a) 3D reciprocal space reconstruction from the RED data. The target crystal from which RED data were collected is shown. The 2D slice of  $Ok\bar{l}$  (b),  $h0\bar{l}$  (c),  $hk0$  (d) show  $mmm$  symmetry, confirming an orthorhombic system. The reflection conditions are deduced to be:  $hkl$ :  $h + k = 2n$ ,  $h + l = 2n$ ,  $k + l = 2n$ ;  $Ok\bar{l}$ :  $k = 2n$ ,  $l = 2n$ ;  $h0\bar{l}$ :  $h = 2n$ ,  $l = 2n$ ;  $hk0$ :  $h = 2n$ ,  $k = 2n$ ;  $h00$ :  $h = 2n$ ;  $0k0$ :  $k = 2n$ . The possible space groups are  $F222$ ,  $Fmm2$ ,  $Fm2m$ ,  $F2mm$ ,  $Fmmm$ .

### S1. Rietveld refinement of as-synthesised JU110 against PXRD data

High-resolution PXRD data of JU110 was collected at 100 K at experimental station 11-BM at APS, using monochromated X-rays of wavelength 0.459255 Å. The sample was sealed in a kapton capillary of 1.0 mm in diameter. The structure model of JU110 was initiated using the atomic coordinates obtained from RED data and refined by Rietveld refinement using Topas Academic version 4.1. The refinement was conducted using a Pearson VII type peak profile function, followed by refinement of background, unit cells and zero-shift. Geometric restraints were applied to all unique bond distances and angles (1.74 Å for T-O bond lengths and 109.5° for O-T-O bond angles, except the bond lengths and bond angles for Ge10). The SDA molecules were located by simulated annealing algorithm, while the F- ions and the disordered Ge7 clusters were found from the Fourier difference map. Finally,  $R$ -value was converged to  $R_p = 0.090$ ,  $R_{wp} = 0.119$ ,  $R_{exp} = 0.042$ , and  $GOF = 2.81$ .

**Table S3.** Crystallographic data, experimental conditions for powder X-ray data collection and results of the Rietveld refinement of JU110.

|                             |                                          |
|-----------------------------|------------------------------------------|
| Chemical formula            | $C_9H_{16}FGe_{6.11}NO_{13.75}Si_{0.64}$ |
| Formula weight              | 837.98 g/mol                             |
| Crystal system              | Orthorhombic                             |
| Space group                 | $Fm2m$                                   |
| $a/\text{Å}$                | 13.9117(2)                               |
| $b/\text{Å}$                | 18.2980(3)                               |
| $c/\text{Å}$                | 32.7800(6)                               |
| $Z$                         | 16                                       |
| Temperature/K               | 100 K                                    |
| Wavelength/Å                | 0.427654                                 |
| $2\theta$ range/°           | 0.6-28                                   |
| No. of reflections          | 1501                                     |
| No. of structural variables | 160                                      |
| No. of restraints           | 36 for T-O and 54 for O-T-O              |
| $R_p$                       | 0.090                                    |
| $R_{wp}$                    | 0.119                                    |
| $R_{exp}$                   | 0.042                                    |
| $GOF$                       | 2.81                                     |

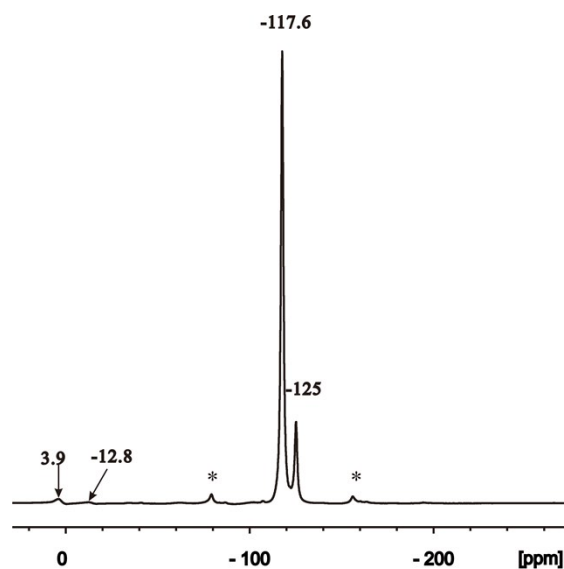

**Fig. S6** The  $^{19}\text{F}$  MAS NMR spectrum of as-synthesized JU110. The resonance at -12.8 ppm suggests fluoride inside the D4R units [Pulido *et al*, ChemPhysChem 2006, 7, 1092 – 1099]. The resonances at -117.6 ppm and -125 ppm are possibly due to germanium oxyfluoride impurities caused by hydrolysis of the materials on washing with water [Villaescusa *et al*, DaltonTrans., 2004, 820 – 824].

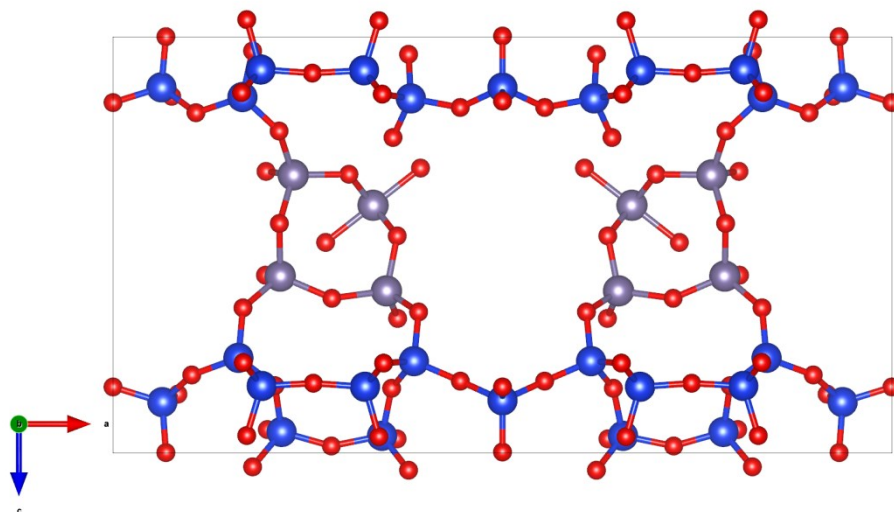

**Fig. S7** [010] projection of the hypothetical structure model built by replacing the D4Rs in the **UWY** zeolite framework by  $\text{Ge}_7$  clusters (blue: Si, gray: Ge, red: O). The hypothetical structure has space group  $Pmm2$  with  $a = 24.22 \text{ \AA}$ ,  $b = 11.80 \text{ \AA}$ ,  $c = 12.92 \text{ \AA}$ .

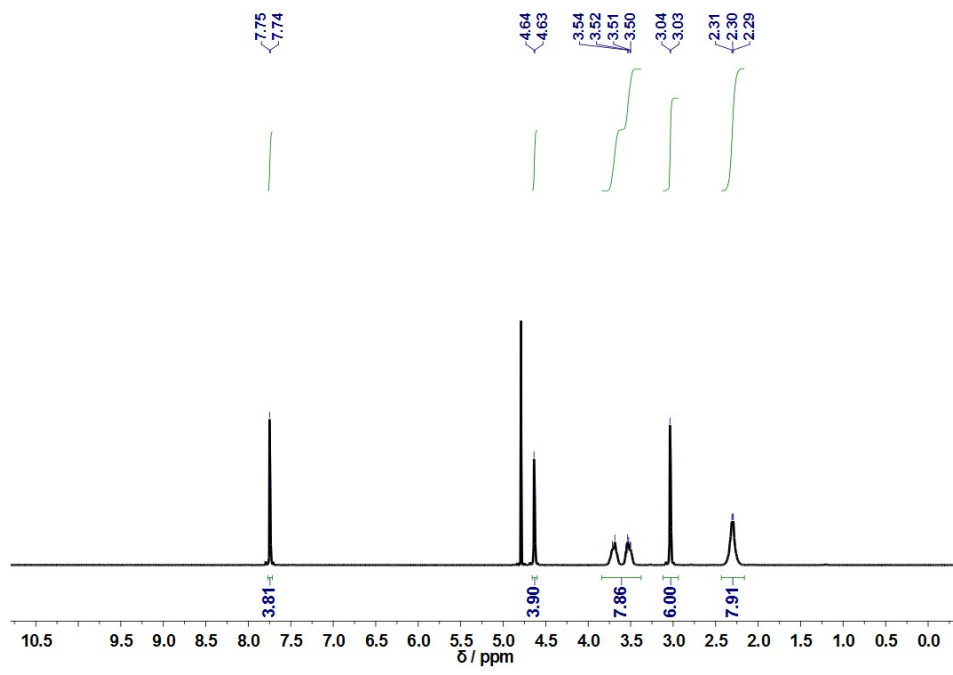

**Fig.S8** The <sup>1</sup>H NMR spectra of OSDABr.
